# Supplementary material for: Inhibition of stress-inducible HSP70 impairs mitochondrial proteostasis and function
Source: PubMed Central journal article supplement (PMC5542216; doi:10.18632/oncotarget.17321), 2017-04-21
Supplement: oncotarget-08-45656-s001.pdf [file oncotarget-08-45656-s001.pdf]

## Inhibition of stress-inducible HSP70 impairs mitochondrial proteostasis and function

### SUPPLEMENTARY FIGURES

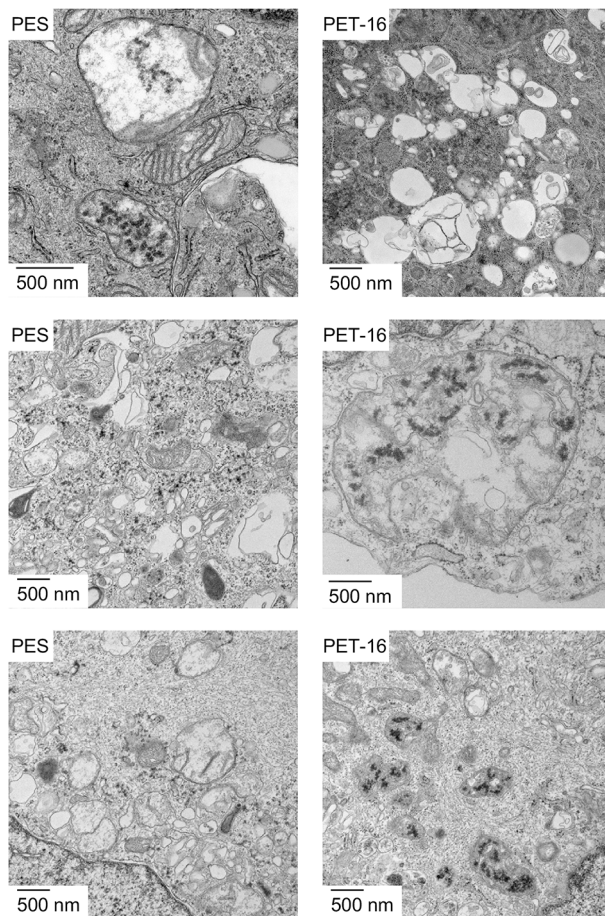

**Supplementary Figure 1: Transmission electron micrographs (EM) of cells after treatment with HSP70 inhibitors.** Representative images of A875 melanoma cells that were exposed to 20  $\mu$ M PES or PET-16 for 24h.

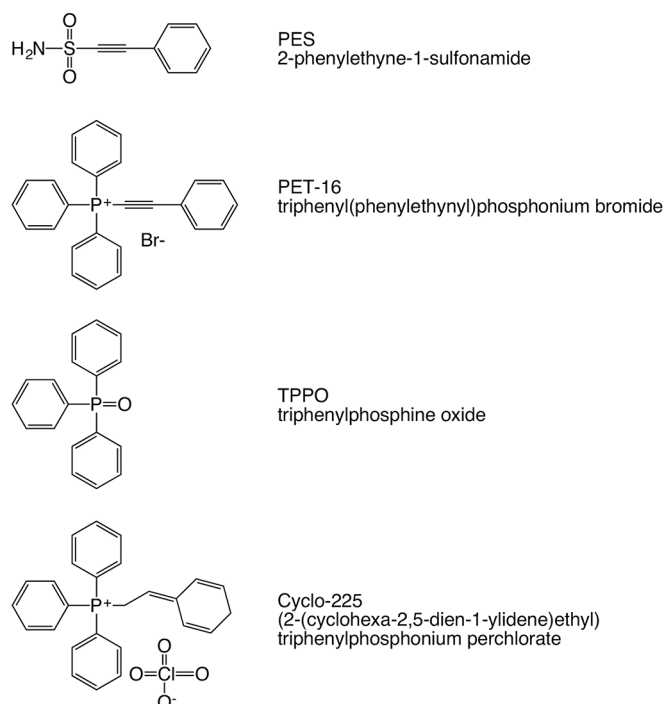

**Supplementary Figure 2: Chemical structures of small molecules used in this study.** Structures shown for PES, PET-16, TPPO and Cyclo-225.

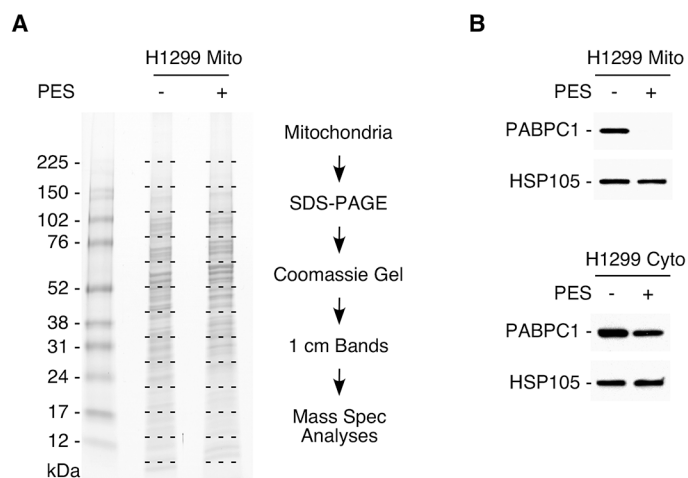

**Supplementary Figure 3: PES alters expression pattern of mitochondrial proteins.** (A) Isolated mitochondrial proteins from H1299 cells before and after PES treatment (20  $\mu$ M, 24 h) were separated by SDS-PAGE followed by Coomassie staining and contiguous one-centimeter bands were isolated. Proteins subjected to nano-LC-MS/MS analysis and evaluated for changes in abundance of soluble proteins. (B) Western blot analysis of the PABPC1 and HSP105 proteins in purified mitochondrial and cytoplasmic fractions of H1299 cells after 24 h of PES treatment (20  $\mu$ M).

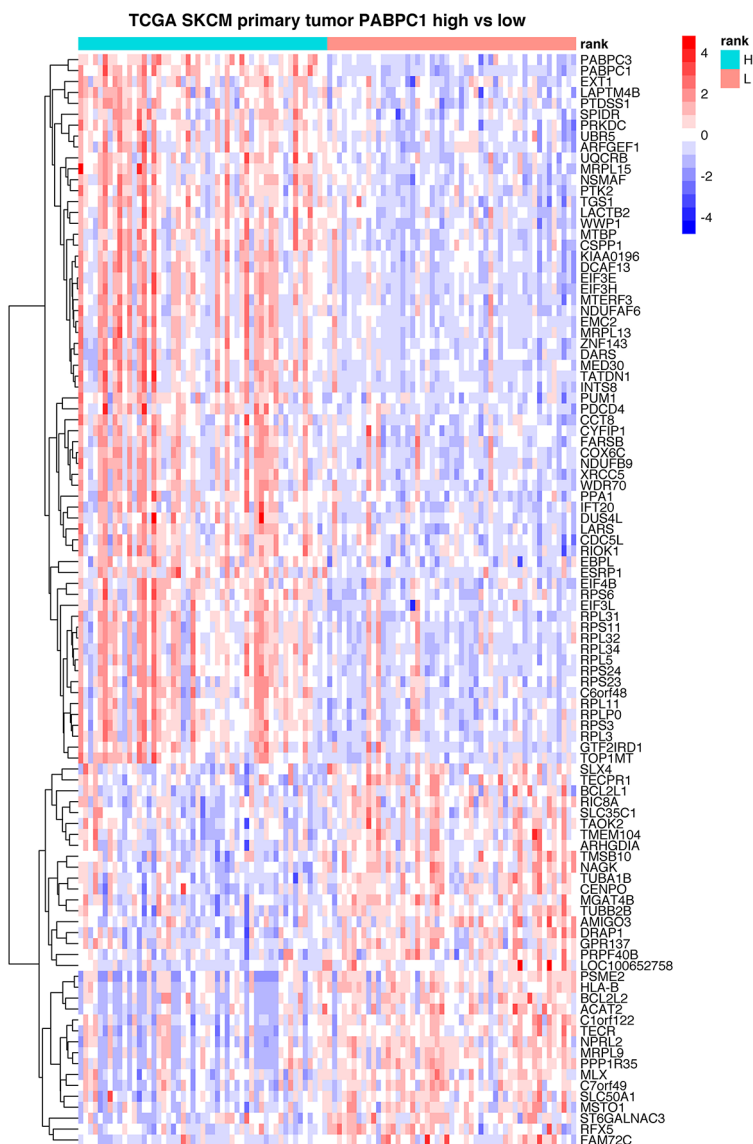

**Supplementary Figure 4: Heat map of differentially expressed genes in TCGA melanoma patients.** The data represent 100 significantly expressed genes that distinguish patients having high or low expression of PABPC1.
